# Supplementary material for: Photoinduced δ electron transfer in phenylene bridged Mo2 dimers
Source: Royal Society of Chemistry journal article supplement (doi:10.1039/c6cp07582g), 2016-12-12
Supplement: c6cp07582g1.pdf [file c6cp07582g1.pdf]

## Photoinduced $\delta$ Electron Transfer in Phenylene Bridged Mo<sub>2</sub> Dimers

Tao Cheng, Xuan Xiao, Lei Zhang, Chun Y. Liu\*, Li-Li Wang, Miao Meng, Fang Zhao, Hui Wang\* and Liang-Nian Ji

### Supporting Information

#### Table of Contents

#### 1. Preparation of Compounds.

#### 2. Physical Measurements

**Table S1:** Spectroscopic and electrochemical data for estimation of  $\delta$  electron energies in the excited states.

**Figure S1:** Energy diagrams for electronic states for the studied Mo<sub>2</sub> dimeric systems.

**Figure S2:** Stead-state electronic spectra for the neutral and MV states and the resultant difference spectra of dimer complexes in comparison with the femtosecond transient spectra.

#### 3. Kinetic traces and data fitting for the excited states

**Figure S3:** Transient absorption traces for [O<sub>2</sub>-ph-O<sub>2</sub>] at various wavelengths.

**Figure S4:** Transient absorption traces for [OS-ph-OS] at various wavelengths.

**Figure S5:** Transient absorption traces for [S<sub>2</sub>-ph-S<sub>2</sub>] at various wavelengths.

**Figure S6:** Transient absorption traces for [O<sub>2</sub>-ph-S<sub>2</sub>] at various wavelengths.

**Table S2:** Formation time ( $\tau_{CS}$ ) and lifetimes ( $\tau_{CR-1}$  and  $\tau_{CR-2}$ ) for the excited states in System [O<sub>2</sub>-ph-O<sub>2</sub>].

**Table S3:** Formation time ( $\tau_{CS}$ ) and lifetimes ( $\tau_{CR-1}$  and  $\tau_{CR-2}$ ) for the excited states in system [OS-ph-OS].

**Table S4:** Formation time ( $\tau_{CS}$ ) and lifetimes ( $\tau_{CR-1}$  and  $\tau_{CR-2}$ ) for the excited states in system [S<sub>2</sub>-ph-S<sub>2</sub>].

**Table S5:** Formation time ( $\tau_{CS}$ ) and lifetimes ( $\tau_{CR-1}$  and  $\tau_{CR-2}$ ) for the excited states in system [O<sub>2</sub>-ph-S<sub>2</sub>].

## 1. Preparation of Compounds.

The four neutral Mo<sub>2</sub> dimers were synthesized by following the published procedures (Xiao, X.; Liu, C. Y.; He, Q.; Han, M. J.; Meng, M.; Lei, H.; Lu, X. *Inorg. Chem.* **2013**, *52*, 12624–12633). The compounds were characterized by <sup>1</sup>H NMR spectra. The corresponding mixed-valence complexes were prepared by chemical oxidation using one equiv of ferrocenium hexafluorophosphate.

## 2. Physical Measurements.

### 2.1 Electronic Spectroscopies for the Neutral and the Mixed-valence Complexes

Cyclic voltammograms (CVs) were performed using a CH Instruments model-CHI660D electrochemical analyzer in 0.10 M <sup>n</sup>Bu<sub>4</sub>NPF<sub>6</sub> solution in CH<sub>2</sub>Cl<sub>2</sub> with Pt working and auxiliary electrodes, Ag/AgCl reference electrode, and a scan rate of 100 mV/s. UV-vis spectra were measured on a Shimadzu UV-3600 UV-vis-NIR spectrophotometer in CH<sub>2</sub>Cl<sub>2</sub> solutions using IR quartz cells with light path length of 2 mm.

### 2.2 Femtosecond Transient Spectral Spectroscopies

The femtosecond transient spectral studies were performed on the time-resolved absorbance difference spectrometer equipped with a regenerative Ti/sapphire amplifier with 500 Hz repetition (Legend Elite USP HE+, Coherent, 35 fs, 800 nm). The output laser was split into two beams. One beam with a power of 6 μJ per pulse was focused onto pure water to generate a white light continuum as a probe beam. The other beam went into an optical parametric amplifier (OPerA Solo) to generate the pump beam centered at 355 nm and then passed to the translation stage. A mechanical chopper was employed to modulate the pump repetition frequency. The pump and probe pulses were focused to a diameter of 500 and 200 μm, respectively, at a cell interface using two plano-concave mirrors. The samples were stirring in the cell to avoid photo damage. The probe pulse was recorded on a fiber spectrometer (Avantes, AvaSpec\_ULS2048L-USB2) in external trigger mode. The polarization of the pump beam was set to the magic angle (54.7°) with respect to the probe beam. The optical path in samples was 5 mm and the pump energy was 2 μJ per pulse.

**Table S1.** Spectroscopic and electrochemical data for estimation of  $\delta$  electron energies in the excited states.

| compound                             | $E_{1/2}(1)$<br>(mV) | $E(\delta \rightarrow \delta^*)$<br>(nm/eV) | $E(\text{MLCT})$<br>(nm/eV) | $E(\text{LMCT})$<br>(nm/eV) |
|--------------------------------------|----------------------|---------------------------------------------|-----------------------------|-----------------------------|
| [O <sub>2</sub> -ph-O <sub>2</sub> ] | 335                  | 425/2.92                                    | 491/2.52                    | 560                         |
| [OS-ph-OS]                           | 468                  | 460/2.69                                    | 650/1.91                    | 750                         |
| [S <sub>2</sub> -ph-S <sub>2</sub> ] | 502                  | 500/2.48                                    | 722/1.72                    | 807                         |
| [O <sub>2</sub> -ph-S <sub>2</sub> ] | 292                  | 450/2.75                                    | 627/1.98                    | 780                         |

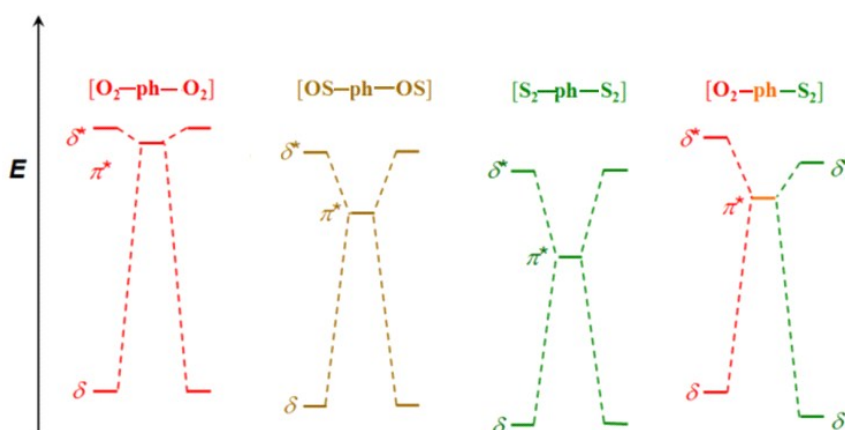

**Figure S1.** Energy diagrams for electronic states for the studied Mo<sub>2</sub> dimeric systems, plotted based on electrochemical and spectroscopic data.

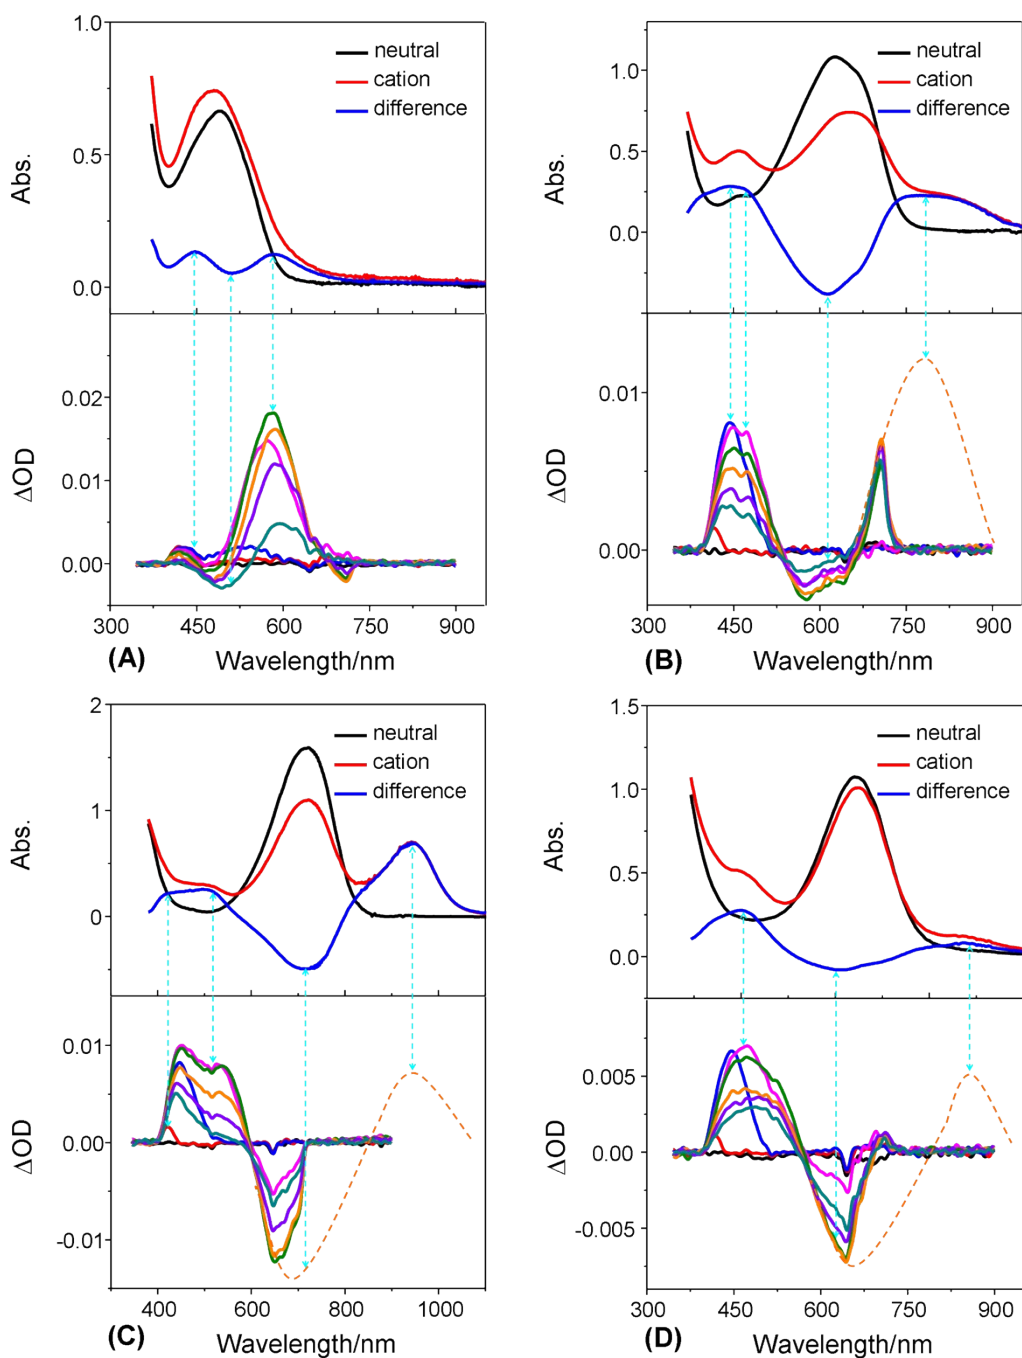

**Figure S2.** Stead-state electronic spectra of the neutral and MV states and the resultant difference spectra for complexes [O<sub>2</sub>-ph-O<sub>2</sub>](A), [OS-ph-OS](B), [S<sub>2</sub>-ph-S<sub>2</sub>](C) and [O<sub>2</sub>-ph-S<sub>2</sub>](D), in comparison with the femtosecond transient absorptions for the corresponding photochemical system. The dashed lines indicate the absorptions trucked by the instrumental limits.

### 3. Kinetic traces and data fitting for the excited states

#### 3.1 For systems $[Mo_2]-ph-[Mo_2]$

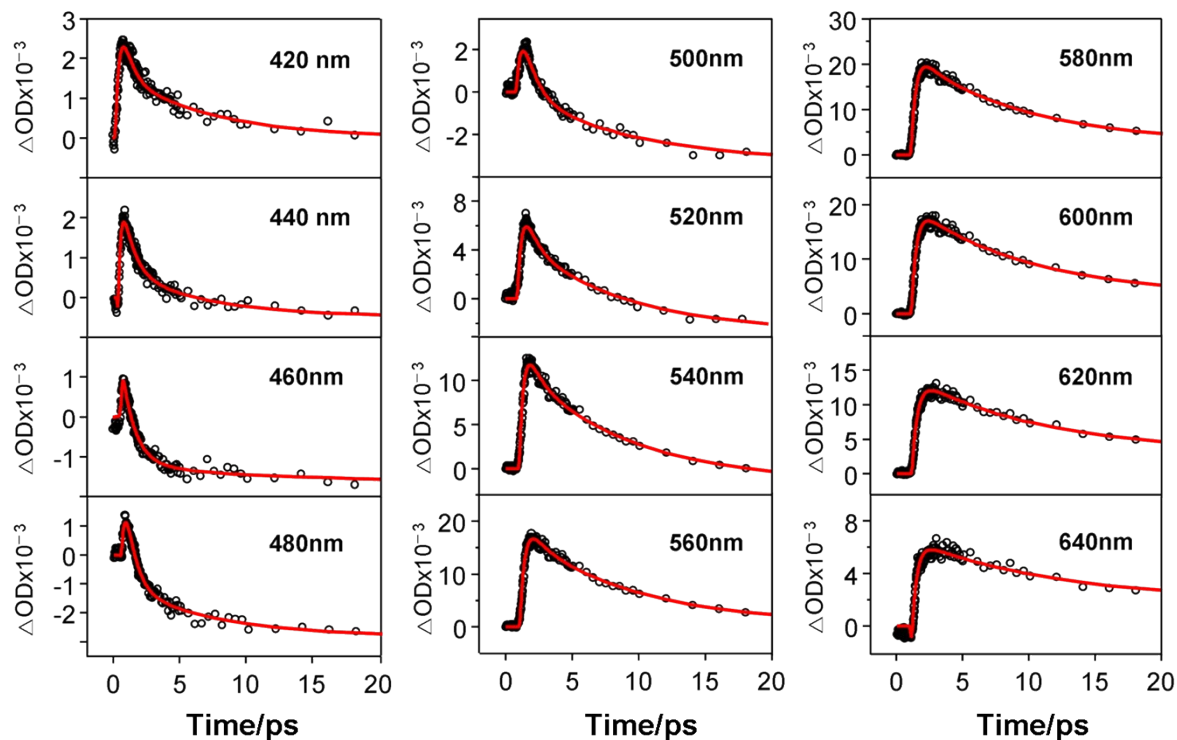

Figure S3: Transient absorption traces for  $[O_2-ph-O_2]$  at various wavelengths.

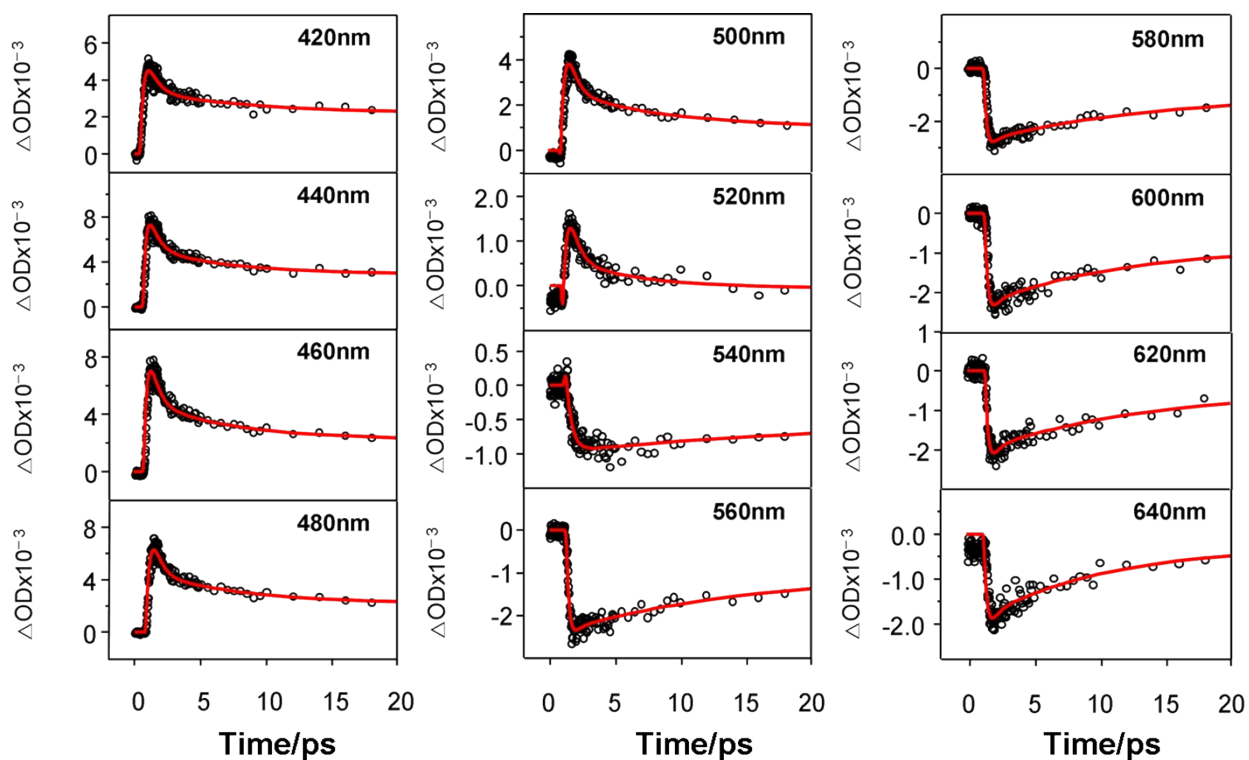

Figure S4: Transient absorption traces for  $[OS-ph-OS]$  at various wavelengths.

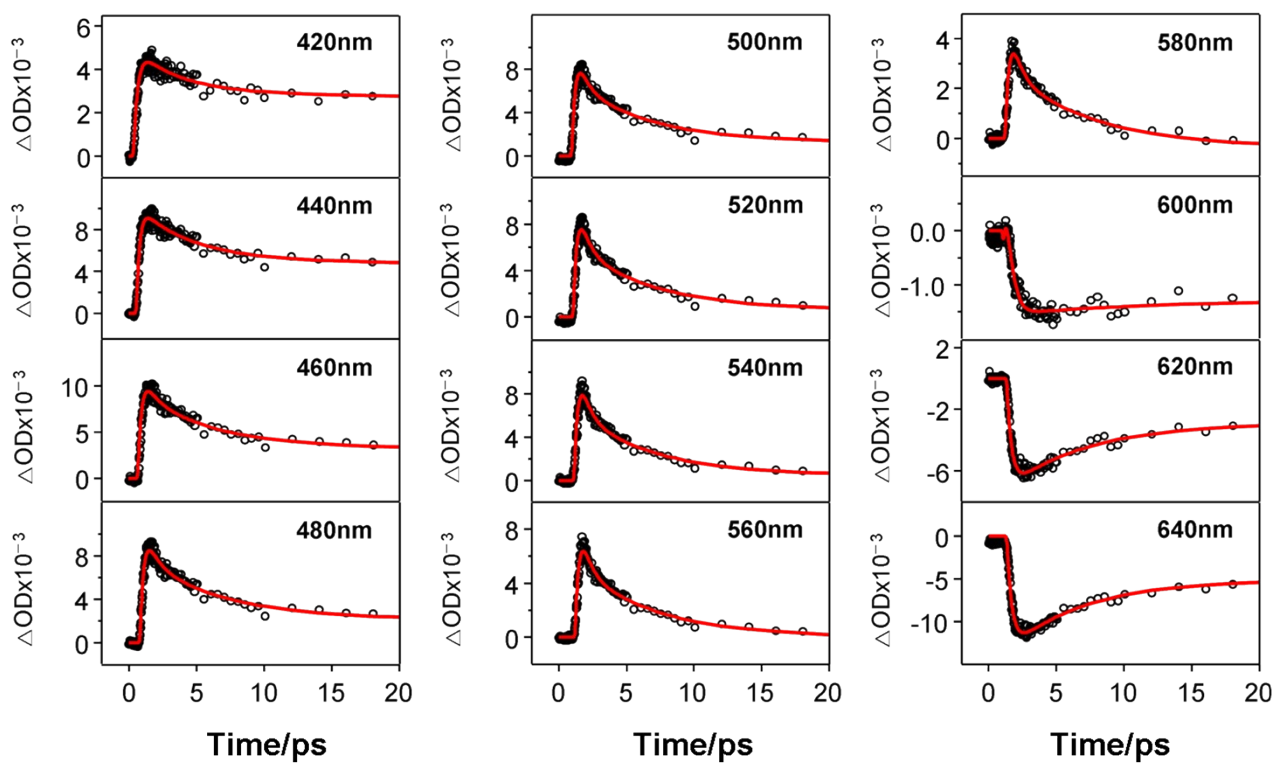

**Figure S5:** Transient absorption traces for  $[S_2\text{-ph-S}_2]$  at various wavelengths.

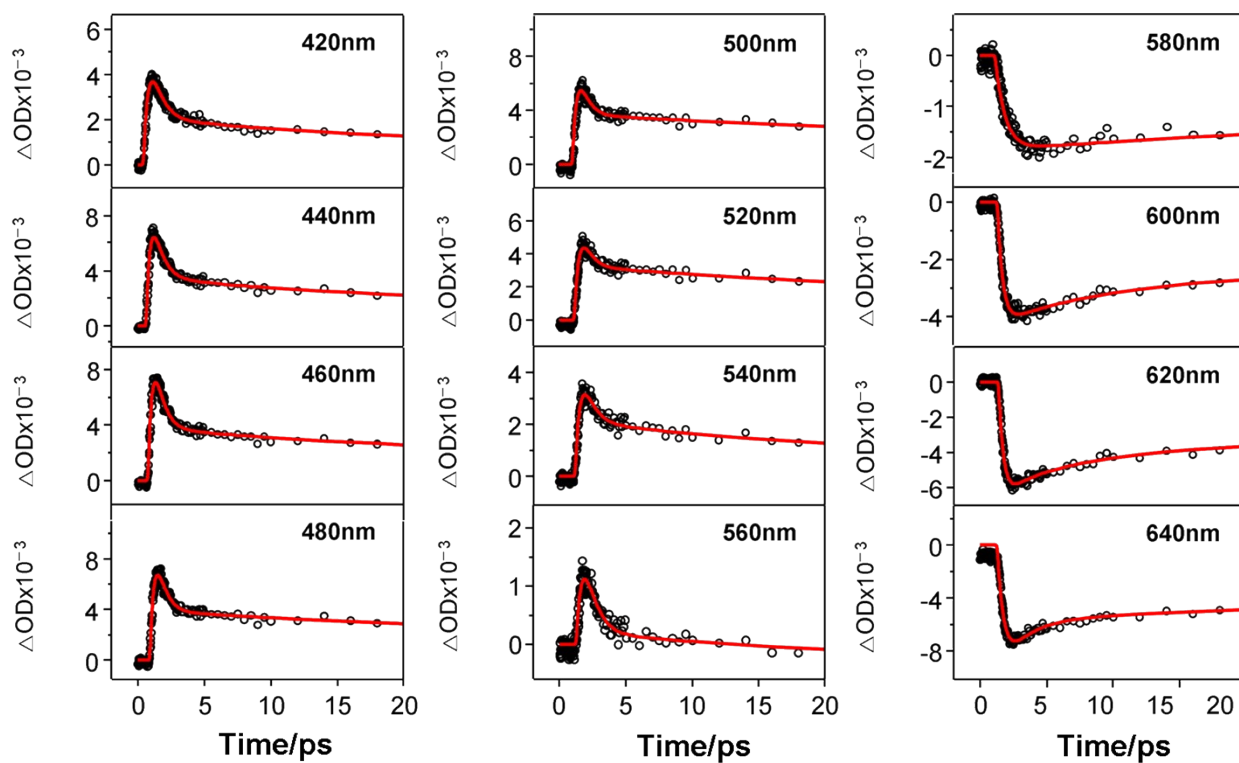

**Figure S6:** Transient absorption traces for  $[O_2\text{-ph-S}_2]$  at various wavelengths.

**Table S2.** Formation time ( $\tau_{CS}$ ) and lifetimes ( $\tau_{CR-1}$  and  $\tau_{CR-2}$ ) for the excited states in system [O<sub>2</sub>-ph-O<sub>2</sub>].

| $\tau$ (ps)   | 420 nm     | 440 nm     | 460 nm     | 480 nm     | 500 nm     | 520 nm     |
|---------------|------------|------------|------------|------------|------------|------------|
| $\tau_{CS}$   | 0.36       | 0.19       | 0.26       | 0.26       | 0.36       | 0.35       |
| $\tau_{CR-1}$ | 0.56 (81%) | 0.82 (70%) | 0.58 (88%) | 0.69 (77%) | 0.92 (65%) | 0.76 (53%) |
| $\tau_{CR-2}$ | 6.85 (19%) | 5.98 (30%) | 4.97 (12%) | 6.63 (23%) | 8.52 (35%) | 7.86 (47%) |
| $\tau$ (ps)   | 540 nm     | 560 nm     | 580 nm     | 600 nm     | 620 nm     | 640 nm     |
| $\tau_{CS}$   | 0.33       | 0.34       | 0.38       | 0.34       | 0.34       | 0.37       |
| $\tau_{CR-1}$ | 0.51 (75%) | 0.47 (80%) | 0.46 (88%) | 0.29 (94%) | /          | /          |
| $\tau_{CR-2}$ | 5.44 (23%) | 5.53 (19%) | 6.36 (12%) | 8.60 (1%)  | 5.79 (59%) | 5.58 (67%) |
| $\tau_{CR-3}$ |            |            |            |            | 312 (41%)  | 276 (33%)  |

**Table S3.** Formation time ( $\tau_{CS}$ ) and lifetimes ( $\tau_{CR-1}$  and  $\tau_{CR-2}$ ) for the excited states in system [OS-ph-OS].

| $\tau$ (ps)   | 420 nm     | 440 nm     | 460 nm     | 480 nm     | 500 nm     | 520 nm     |
|---------------|------------|------------|------------|------------|------------|------------|
| $\tau_{CS}$   | 0.27       | 0.22       | 0.29       | 0.35       | 0.39       | 0.41       |
| $\tau_{CR-1}$ | 0.70 (21%) | 0.68 (25%) | 0.51 (15%) | 0.47 (8%)  | 0.45 (4%)  | 0.45 (2%)  |
| $\tau_{CR-2}$ | 8.32 (79%) | 6.62 (75%) | 6.25 (85%) | 7.25 (92%) | 7.10 (96%) | 5.40 (98%) |
| $\tau$ (ps)   | 540 nm     | 560 nm     | 580 nm     | 600 nm     | 620 nm     | 640 nm     |
| $\tau_{CS}$   | 0.43       | 0.27±0.24  | 0.26±0.19  | 0.29       | 0.32       | 0.31       |
| $\tau_{CR-1}$ | 0.47 (49%) | 0.30 (11%) | 0.32 (20%) | 0.32 (8%)  | 0.35 (7%)  | 0.34 (8%)  |
| $\tau_{CR-2}$ | 24.7 (51%) | 14.0 (89%) | 12.7 (80%) | 10.7 (92%) | 12.3 (93%) | 9.53 (92%) |

**Table S4.** Formation time ( $\tau_{CS}$ ) and lifetimes ( $\tau_{CR-1}$  and  $\tau_{CR-2}$ ) for the excited states in system [S<sub>2</sub>-ph-S<sub>2</sub>].

| $\tau$ (ps)   | 420 nm     | 440 nm     | 460 nm     | 480 nm     | 500 nm     | 520 nm     |
|---------------|------------|------------|------------|------------|------------|------------|
| $\tau_{CS}$   | 0.36       | 0.26       | 0.29       | 0.29       | 0.30       | 0.29       |
| $\tau_{CR-1}$ | 0.39 (14%) | 0.47 (46%) | 0.58 (38%) | 0.62 (38%) | 0.51 (30%) | 0.57 (32%) |
| $\tau_{CR-2}$ | 3.48 (17%) | 4.16 (39%) | 5.14 (19%) | 5.55 (13%) | 5.34 (7%)  | 5.49 (4%)  |
| $\tau_{CR-3}$ | 306 (69%)  | 381 (15%)  | 403 (43%)  | 344 (49%)  | 307 (63%)  | 157 (64%)  |
| $\tau$ (ps)   | 540 nm     | 560 nm     | 580 nm     | 600 nm     | 620 nm     | 640 nm     |
| $\tau_{CS}$   | 0.33       | 0.34       | 0.38       | 0.34       | 0.34       | 0.37       |
| $\tau_{CR-1}$ | 0.51 (75%) | 0.47 (80%) | 0.46 (88%) | 0.29 (94%) | /          | /          |
| $\tau_{CR-2}$ | 5.44 (23%) | 5.53 (19%) | 6.36 (12%) | 8.60 (1%)  | 5.79 (59%) | 5.58 (67%) |
| $\tau_{CR-3}$ | 48.4 (2%)  | 9.6 (1%)   | /          | 440 (5%)   | 312 (41%)  | 276 (33%)  |

**Table S5.** Formation time ( $\tau_{CS}$ ) and lifetimes ( $\tau_{CR-1}$  and  $\tau_{CR-2}$ ) for the excited states in system [O<sub>2</sub>-ph-S<sub>2</sub>].

| $\tau$ (ps)   | 420 nm     | 440 nm     | 460 nm     | 480 nm     | 500 nm     | 520 nm     |
|---------------|------------|------------|------------|------------|------------|------------|
| $\tau_{CS}$   | 0.41       | 0.31       | 0.33       | 0.38       | 0.40       | 0.44       |
| $\tau_{CR-1}$ | 0.65 (87%) | 0.65 (79%) | 0.56 (86%) | 0.51 (90%) | 0.47 (92%) | 0.48 (94%) |
| $\tau_{CR-2}$ | 17.2 (7%)  | 14.7 (10%) | 17.9 (6%)  | 25.5 (4%)  | 29.3 (4%)  | 76.8 (3%)  |
| $\tau_{CR-3}$ | 152 (6%)   | 170 (11%)  | 163 (8%)   | 167 (6%)   | 208 (4%)   | 178 (3%)   |
| $\tau$ (ps)   | 540 nm     | 560 nm     | 580 nm     | 600 nm     | 620 nm     | 640 nm     |
| $\tau_{CS}$   | 0.49       | 0.60       | 0.58       | 0.47       | 0.48       | 0.63       |
| $\tau_{CR-1}$ | 0.53 (96%) | 0.57 (99%) | 0.58(97%)  | 0.48 (94%) | 0.50 (91%) | 0.69 (88%) |
| $\tau_{CR-2}$ | 16.3 (2%)  | 19.9 (1%)  | 49.1 (2%)  | 7.71 (2%)  | 5.74 (3%)  | 2.21 (5%)  |
| $\tau_{CR-3}$ | 148 (2%)   |            | 486 (1%)   | 131 (4%)   | 105 (6%)   | 85 (7%)    |
